# Supplementary material for: A reverse transcription-free real-time PCR assay for rapid miRNAs quantification based on effects of base stacking
Source: Royal Society of Chemistry journal article supplement (doi:10.1039/c1cc10442j), 2011-01-01
Supplement: c1cc10442j.pdf [file c1cc10442j.pdf]

## Electronic Supplementary Information

### A reverse transcription-free real-time PCR assay for rapid miRNAs quantification based on effects of base stacking

Zhuoxuan Lu, Demin Duan, Rong Cao, Liming Zhang, Kexiao Zheng and Jiong Li\*

Suzhou Institute of Nano-tech and Nano-bionics, Chinese Academy of Sciences, 398 Ruoshui Road, Dushu Lake Higher Education Town Suzhou Industrial Park, Suzhou 215123 (P. R. China).

Fax: (+86) 512-62603079; E-mail: [jli2006@sinano.ac.cn](mailto:jli2006@sinano.ac.cn)

#### Experimental Section

Sequences of mature and precursor miRNAs including the let-7 family, mir-21, mir-23a and mir-29b were selected from the Sanger Center miRbase (<http://microrna.sanger.ac.uk/sequences>), and sequence of U6 was obtained from NCBI database (<http://www.ncbi.nlm.nih.gov>). Synthetic mature miRNAs were purchased from Shanghai GenePharm. All of the DNA primers were purchased from Invitrogen. Oligonucleotides were purified by polyacrylamide gel electrophoresis. Real-time PCR was performed on LightCycler® 480 Real-Time PCR Instrument (Roche). The 10 µL PCR usually included 5 µL 2×RT-PCR Master Mix (Brilliant III SYBR Green QPCR Master Mix, Agilent Technologies), 1 µL target RNA, 0.14 µM universal primer, 0.7 µM specific primer. The reactions were incubated in a 96-well plate at 95 °C for 3 min, followed by 35 cycles of 95 °C for 10 s, 50–56 °C for 10 s and 72 °C for 10 s. U6 snRNA served as endogenous control to normalize expression of miRNAs. All reactions were run in triplicate and all solutions were prepared in DEPC-treated deionized water (TaKaRa Biotechnology Co.Ltd.)

Total RNA was extracted from two cell lines by use of AccuZol reagent (Bioneer, Korean) according to the manufacturer's instructions. In brief, AccuZol™ (1 mL per 10 cm<sup>2</sup> of culture dish area) was added to lyse cells directly in the culture dish. After that, add 200 µL of chloroform per 1 mL of AccuZol™ and shake vigorously for 15 s and incubated at room temperature on ice for 5 min. The samples were centrifuged at 12,000 g for 15 min at 4 °C and the upper aqueous phase were carefully removed without disturbing the lower phase into a fresh tube. The same

volumes of isopropyl alcohol were added and mixed well. The samples were incubated at 15–30 °C for 20 min and centrifuged at 12, 000 g at 4 °C for 10 min. Following centrifugation, the supernatants were removed completely and RNA pellet was washed with 80% ethanol. Finally, RNA pellet was air dried and eluted in nuclease-free water. The two cell lines HLF and A549 were obtained from Professor Yimin Zhu's lab (Suzhou institute of Nano-tech and Nano-bionics, Chinese Academy of Sciences, Suzhou, China). Further small RNAs enrichment was unnecessary in our experiments. The sequences of RNA and DNA oligonucleotides used were listed as follows:

| Primer name | sequence                            |
|-------------|-------------------------------------|
| P-U-3       | 5'-CACACACACACACACACGCA-3'          |
| P-U-4       | 5'-CACACACACACACACACCGCA-3'         |
| P-U-5       | 5'-CACACACACACACACACTCGCA-3'        |
| P-U-6       | 5'-CACACACACACACACACGTCGCA-3'       |
| P-U-7       | 5'-CACACACACACACACACGGTCGCA-3'      |
| mir-21-3    | 5'-TCAACATCAGTCTGATAAGCTATGC-3'     |
| mir-21-4    | 5'-TCAACATCAGTCTGATAAGCTATGCG-3'    |
| mir-21-5    | 5'-TCAACATCAGTCTGATAAGCTATGCGA-3'   |
| mir-21-6    | 5'-TCAACATCAGTCTGATAAGCTATGCGAC-3'  |
| mir-21-7    | 5'-TCAACATCAGTCTGATAAGCTATGCGACC-3' |
| Let-7f-5    | 5'-AACTATAACAATCTACTACCTCATGCGA-3'  |
| Let-7a-5    | 5'-AACTATAACAACCTACTACCTCATGCGA-3'  |
| Let-7b-5    | 5'-AACCACACAACCTACTACCTCATGCGA-3'   |
| Let-7d-5    | 5'-AACTATGCAACCTACTACCTCTTGCGA-3'   |
| mir-23a-5   | 5'-GGAAATCCCTGGCAATGTGATTGCGA-3'    |
| mir-29b-5   | 5'-AACACTGATTTCAAATGGTGCTATGCGA-3'  |
| 106a-5      | 5'-CTACCTGCACTGTAAGCACTTTTGGCGA-3'  |
| 17-5        | 5'-CTACCTGCACTGTAAGCACTTTGTGCGA-3'  |
| U6-1-5      | 5'-TGTGCTGCCGAAGCGAGCACTGCGA-3'     |

| Micro-RNA | sequences                    |
|-----------|------------------------------|
| let-7a    | 5'-UGAGGUAGUAGGUUGUAUAGUU-3' |
| let-7b    | 5'-UGAGGUAGUAGGUUGUGUGGUU-3' |
| let-7d    | 5'-AGAGGUAGUAGGUUGCAUAGUU-3' |
| let-7f    | 5'-UGAGGUAGUAGAUUGUAUAGUU-3' |

mir-21                    5'-UAGCUUAUCAGACUGAUGUUGA-3'  
mir-17                    5'-CAAAGUGCUUACAGUGCAGGUAG-3'  
mir-106a                5'-AAAAGUGCUUACAGUGCAGGUAG-3'

### Amplification efficiency produced by different lengths of bridging sequence

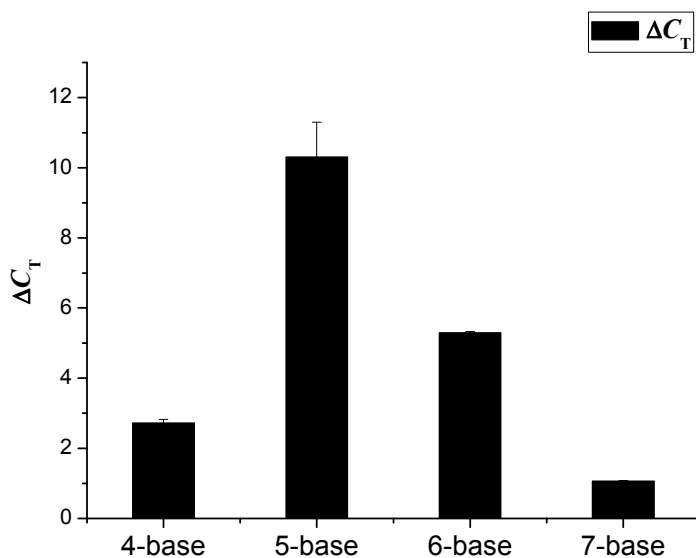

**Fig. S1.** Comparison of  $\Delta C_T$  values (targets versus negative control) among 4–7 mer of bridging sequences. The reactions were performed with 5  $\mu$ l 2 $\times$ RT-PCR Master Mix (Brilliant III SYBR Green QPCR Master Mix, Agilent Technologies), 5 nM target RNA (mir-21), 0.14  $\mu$ M universal primer (P-U-4, P-U-5, P-U-6, P-U-7, respectively), 0.7  $\mu$ M miRNA specific-primer (mir-21-4, mir-21-5, mir-21-6, mir-21-7, respectively)

### Distinguishing mir-17 and mir-106a

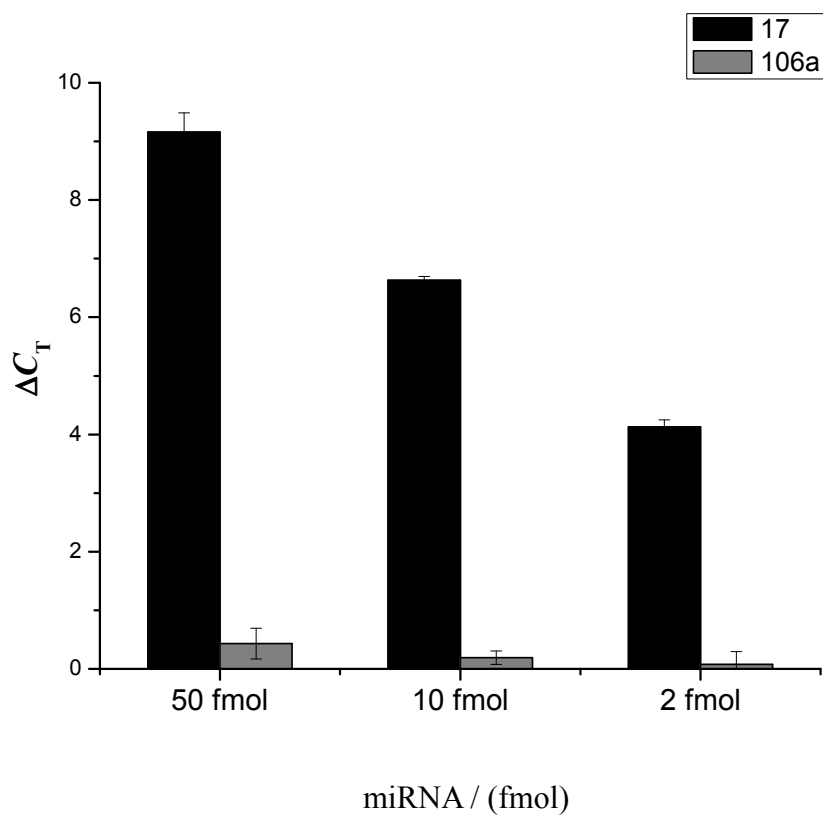

**Fig. S2.** The detection of 5' end single base mismatch based on base stacking effects. 2, 10, 50 fmol of synthetic mir-17 miRNA was used to estimate the specificity of the reverse transcription-free real-time PCR  $\Delta C_T$  values ( $\Delta C_T = C_{T \text{ negative control}} - C_{T \text{ 17}}$ ), respectively.
